# Supplementary material for: Synthesis, Characterization, and Biological Evaluation of Tetrahydropyrimidines: Dual-Activity and Mechanism of Action
Source: MDPI journal article supplement (doi:10.3390/pharmaceutics14102254), 2022-10-21
Supplement: s1 [file s1]

4A

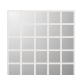

SHIMADZU

LabSolutions

# Analysis Report

## <Sample Information>

Sample Name : 220516 NJ 1909  
 Sample ID : 220516 NJ 1909  
 Data Filename : 220516 NJ 1909.lcd  
 Method Filename : NNDKG.lcm  
 Batch Filename :  
 Vial # : 1-1  
 Injection Volume : 1 uL  
 Date Acquired : 16/05/2022 12:09:58  
 Date Processed : 16/05/2022 12:11:12

Sample Type : Unknown

Acquired by : System Administrator  
 Processed by : System Administrator

MS Spectrum

R.Time:0.433(Scan#:)

MassPeaks:60

Segment 1 - Event 1

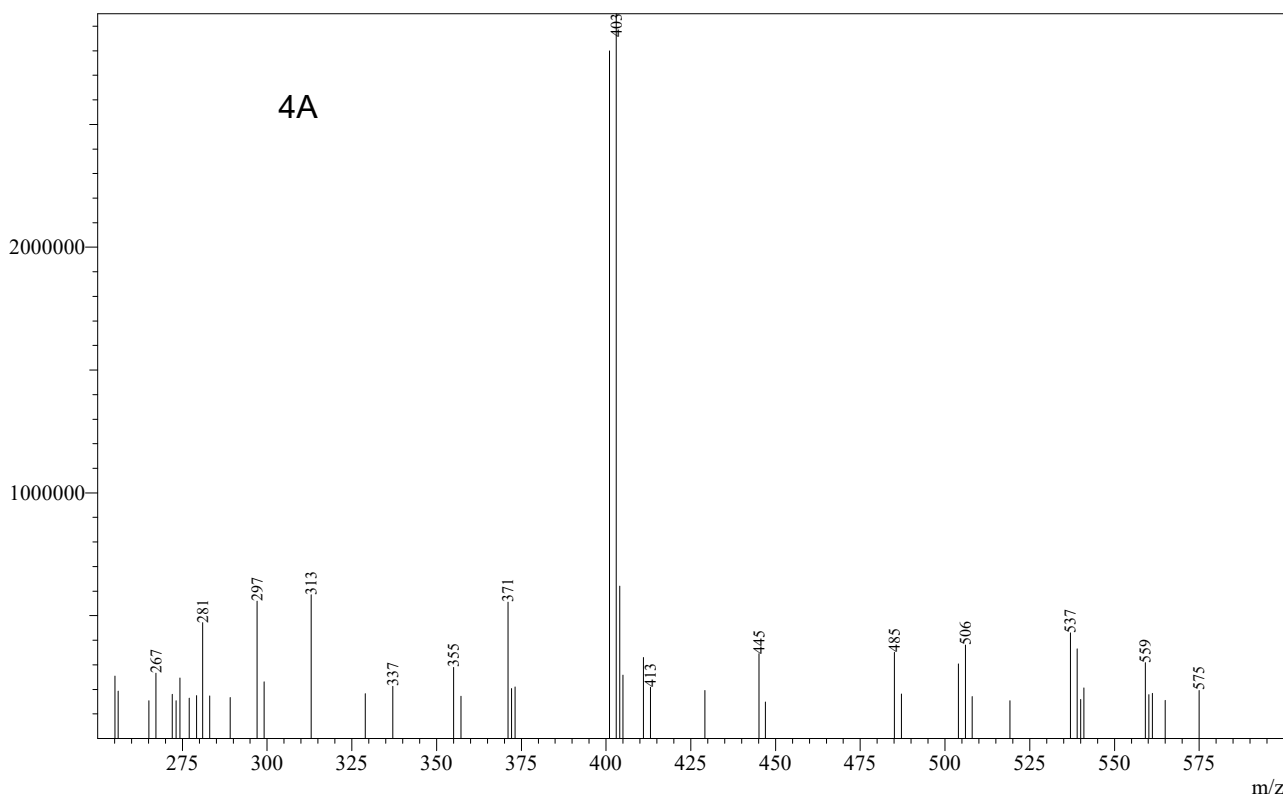

MS Spectrum

R.Time:0.433(Scan#:)

MassPeaks:28

Segment 1 - Event 1

| #  | m/z    | solute Inten | relative Inten |
|----|--------|--------------|----------------|
| 1  | 102.15 | 4385429      | 21.93          |
| 2  | 105.10 | 9714987      | 48.57          |
| 3  | 110.10 | 4366808      | 21.83          |
| 4  | 114.75 | 2231804      | 11.16          |
| 5  | 122.65 | 10073433     | 50.37          |
| 6  | 130.55 | 4621868      | 23.11          |
| 7  | 139.05 | 1369684      | 6.85           |
| 8  | 143.15 | 4442296      | 22.21          |
| 9  | 151.15 | 1695863      | 8.48           |
| 10 | 167.10 | 3695790      | 18.48          |
| 11 | 180.10 | 1467246      | 7.34           |
| 12 | 183.05 | 2992030      | 14.96          |
| 13 | 196.15 | 1832283      | 9.16           |
| 14 | 199.10 | 1058553      | 5.29           |
| 15 | 208.10 | 4964368      | 24.82          |
| 16 | 214.10 | 12945981     | 64.73          |
| 17 | 215.15 | 1660052      | 8.30           |
| 18 | 216.10 | 1066837      | 5.33           |
| 19 | 224.05 | 3194272      | 15.97          |

| #  | m/z    | absolute Inten | relative Inten |
|----|--------|----------------|----------------|
| 20 | 435.25 | 20000000       | 100.00         |
| 21 | 436.30 | 6408858        | 32.04          |
| 22 | 437.30 | 2080486        | 10.40          |
| 23 | 571.20 | 1200278        | 6.00           |
| 24 | 931.45 | 9702024        | 48.51          |
| 25 | 932.45 | 5358266        | 26.79          |
| 26 | 933.45 | 6513540        | 32.57          |
| 27 | 934.40 | 2830446        | 14.15          |
| 28 | 935.35 | 1057383        | 5.29           |

4B

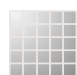SHIMADZU  
LabSolutions

## Analysis Report

## &lt;Sample Information&gt;

Sample Name : 220516 NJ 1911  
 Sample ID : 220516 NJ 1911  
 Data Filename : 220516 NJ 1911.lcd  
 Method Filename : NNDKG.lcm  
 Batch Filename :  
 Vial # : 1-1  
 Injection Volume : 1 uL  
 Date Acquired : 16/05/2022 12:13:52  
 Date Processed : 16/05/2022 12:14:48

Sample Type : Unknown

Acquired by : System Administrator  
 Processed by : System Administrator

MS Spectrum

R.Time:0.433(Scan#:)

MassPeaks:4

Segment 1 - Event 1

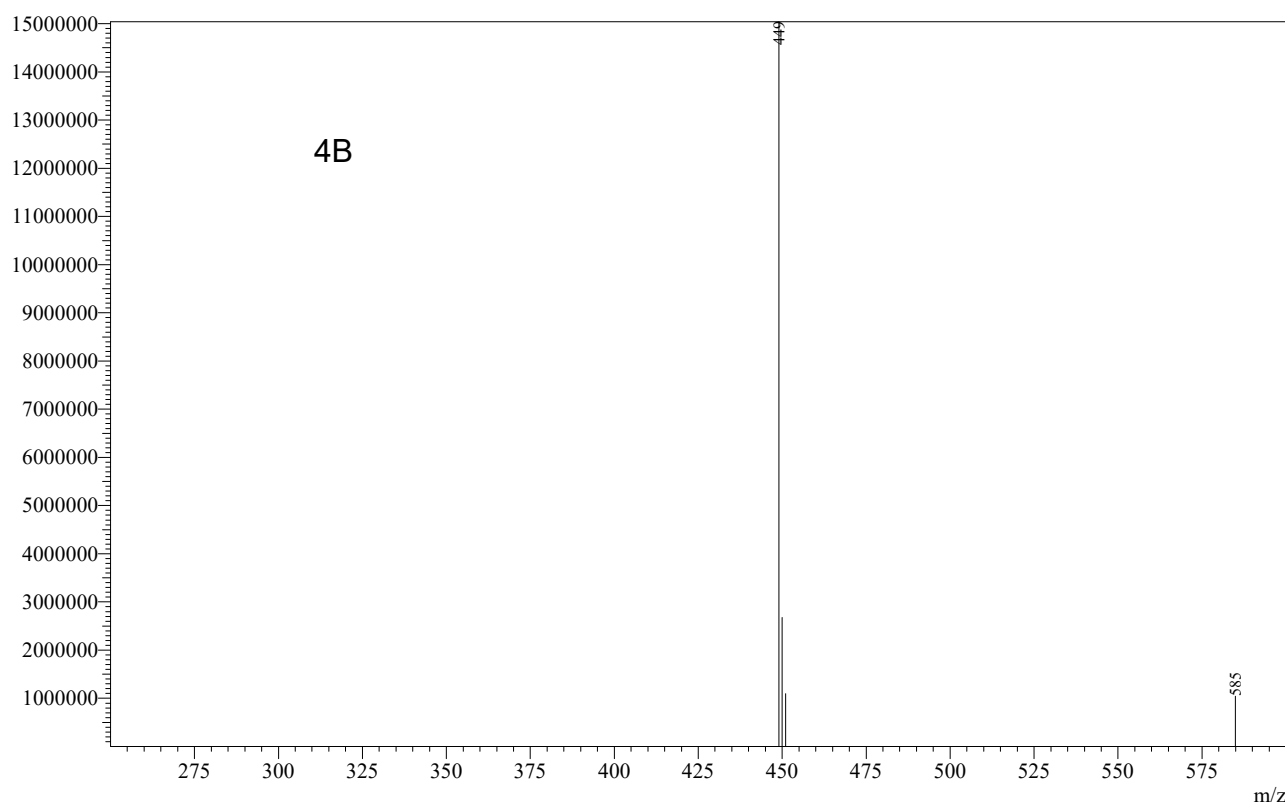

MS Spectrum

R.Time:0.433(Scan#:)

MassPeaks:28

Segment 1 - Event 1

| #  | m/z    | solute Inten | relative Inten |
|----|--------|--------------|----------------|
| 1  | 102.15 | 4385429      | 21.93          |
| 2  | 105.10 | 9714987      | 48.57          |
| 3  | 110.10 | 4366808      | 21.83          |
| 4  | 114.75 | 2231804      | 11.16          |
| 5  | 122.65 | 10073433     | 50.37          |
| 6  | 130.55 | 4621868      | 23.11          |
| 7  | 139.05 | 1369684      | 6.85           |
| 8  | 143.15 | 4442296      | 22.21          |
| 9  | 151.15 | 1695863      | 8.48           |
| 10 | 167.10 | 3695790      | 18.48          |
| 11 | 180.10 | 1467246      | 7.34           |
| 12 | 183.05 | 2992030      | 14.96          |
| 13 | 196.15 | 1832283      | 9.16           |
| 14 | 199.10 | 1058553      | 5.29           |
| 15 | 208.10 | 4964368      | 24.82          |
| 16 | 214.10 | 12945981     | 64.73          |
| 17 | 215.15 | 1660052      | 8.30           |
| 18 | 216.10 | 1066837      | 5.33           |
| 19 | 224.05 | 3194272      | 15.97          |

| #  | m/z    | bsolute Inten | ative Inten |
|----|--------|---------------|-------------|
| 20 | 435.25 | 20000000      | 100.00      |
| 21 | 436.30 | 6408858       | 32.04       |
| 22 | 437.30 | 2080486       | 10.40       |
| 23 | 571.20 | 1200278       | 6.00        |
| 24 | 931.45 | 9702024       | 48.51       |
| 25 | 932.45 | 5358266       | 26.79       |
| 26 | 933.45 | 6513540       | 32.57       |
| 27 | 934.40 | 2830446       | 14.15       |
| 28 | 935.35 | 1057383       | 5.29        |

4C

SHIMADZU  
LabSolutions

## Analysis Report

## &lt;Sample Information&gt;

Sample Name : 220516 NJ 1692  
 Sample ID : 220516 NJ 1692  
 Data Filename : 220516 NJ 1692.lcd  
 Method Filename : NNDKG.lcm  
 Batch Filename :  
 Vial # : 1-1  
 Injection Volume : 1 uL  
 Date Acquired : 16/05/2022 13:05:28  
 Date Processed : 16/05/2022 13:06:24

Sample Type : Unknown

Acquired by : System Administrator  
 Processed by : System Administrator

MS Spectrum

R.Time:0.433(Scan#:)

MassPeaks:5

Segment 1 - Event 1

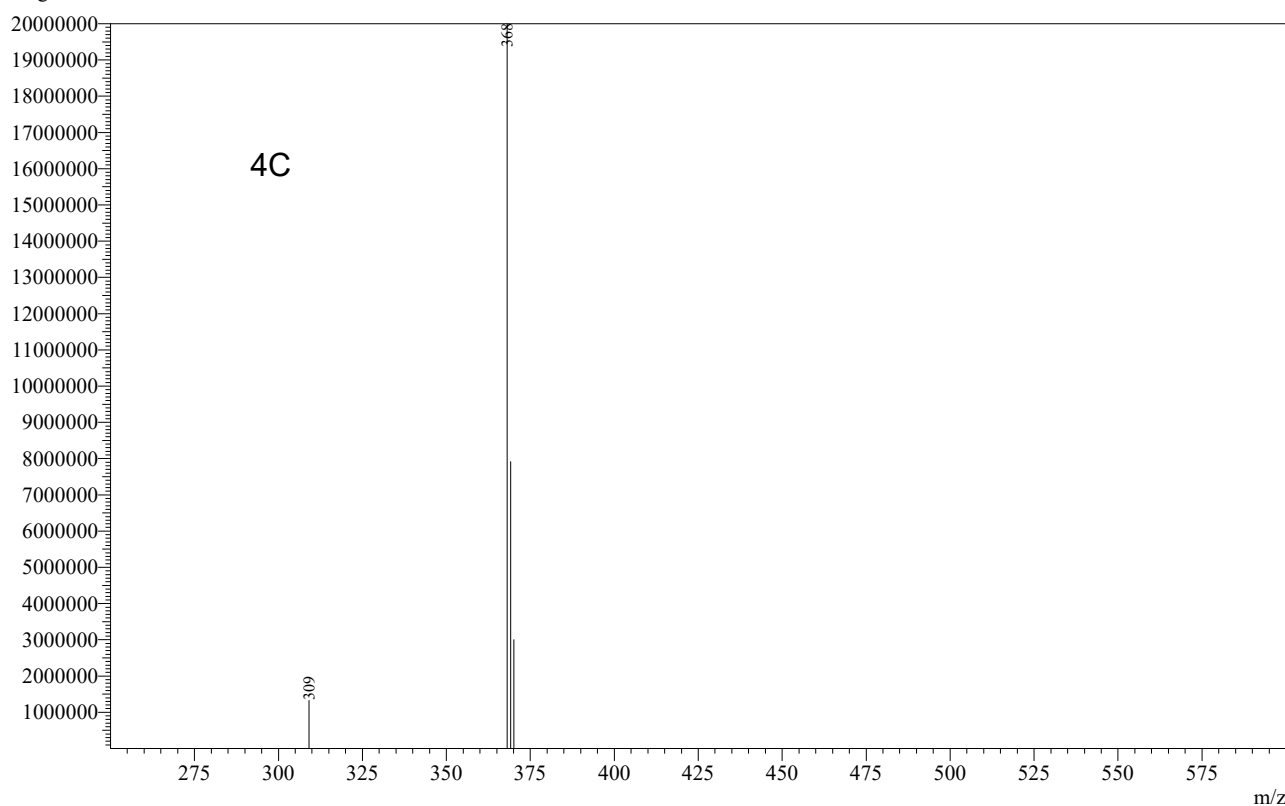

MS Spectrum

R.Time:0.433(Scan#:)

MassPeaks:28

Segment 1 - Event 1

| #  | m/z    | solute Inten | relative Inten |
|----|--------|--------------|----------------|
| 1  | 102.15 | 4385429      | 21.93          |
| 2  | 105.10 | 9714987      | 48.57          |
| 3  | 110.10 | 4366808      | 21.83          |
| 4  | 114.75 | 2231804      | 11.16          |
| 5  | 122.65 | 10073433     | 50.37          |
| 6  | 130.55 | 4621868      | 23.11          |
| 7  | 139.05 | 1369684      | 6.85           |
| 8  | 143.15 | 4442296      | 22.21          |
| 9  | 151.15 | 1695863      | 8.48           |
| 10 | 167.10 | 3695790      | 18.48          |
| 11 | 180.10 | 1467246      | 7.34           |
| 12 | 183.05 | 2992030      | 14.96          |
| 13 | 196.15 | 1832283      | 9.16           |
| 14 | 199.10 | 1058553      | 5.29           |
| 15 | 208.10 | 4964368      | 24.82          |
| 16 | 214.10 | 12945981     | 64.73          |
| 17 | 215.15 | 1660052      | 8.30           |
| 18 | 216.10 | 1066837      | 5.33           |
| 19 | 224.05 | 3194272      | 15.97          |

| #  | m/z    | bsolute Inten | ative Inten |
|----|--------|---------------|-------------|
| 20 | 435.25 | 20000000      | 100.00      |
| 21 | 436.30 | 6408858       | 32.04       |
| 22 | 437.30 | 2080486       | 10.40       |
| 23 | 571.20 | 1200278       | 6.00        |
| 24 | 931.45 | 9702024       | 48.51       |
| 25 | 932.45 | 5358266       | 26.79       |
| 26 | 933.45 | 6513540       | 32.57       |
| 27 | 934.40 | 2830446       | 14.15       |
| 28 | 935.35 | 1057383       | 5.29        |

4D



SHIMADZU

LabSolutions

# Analysis Report

## <Sample Information>

Sample Name : 220516 NJ 1913  
 Sample ID : 220516 NJ 1913  
 Data Filename : 220516 NJ 1913.lcd  
 Method Filename : NNDKG.lcm  
 Batch Filename :  
 Vial # : 1-1  
 Injection Volume : 1 uL  
 Date Acquired : 16/05/2022 12:35:26  
 Date Processed : 16/05/2022 12:36:22

Sample Type : Unknown

Acquired by : System Administrator  
 Processed by : System Administrator

MS Spectrum

R.Time:0.433(Scan#:)

MassPeaks:7

Segment 1 - Event 1

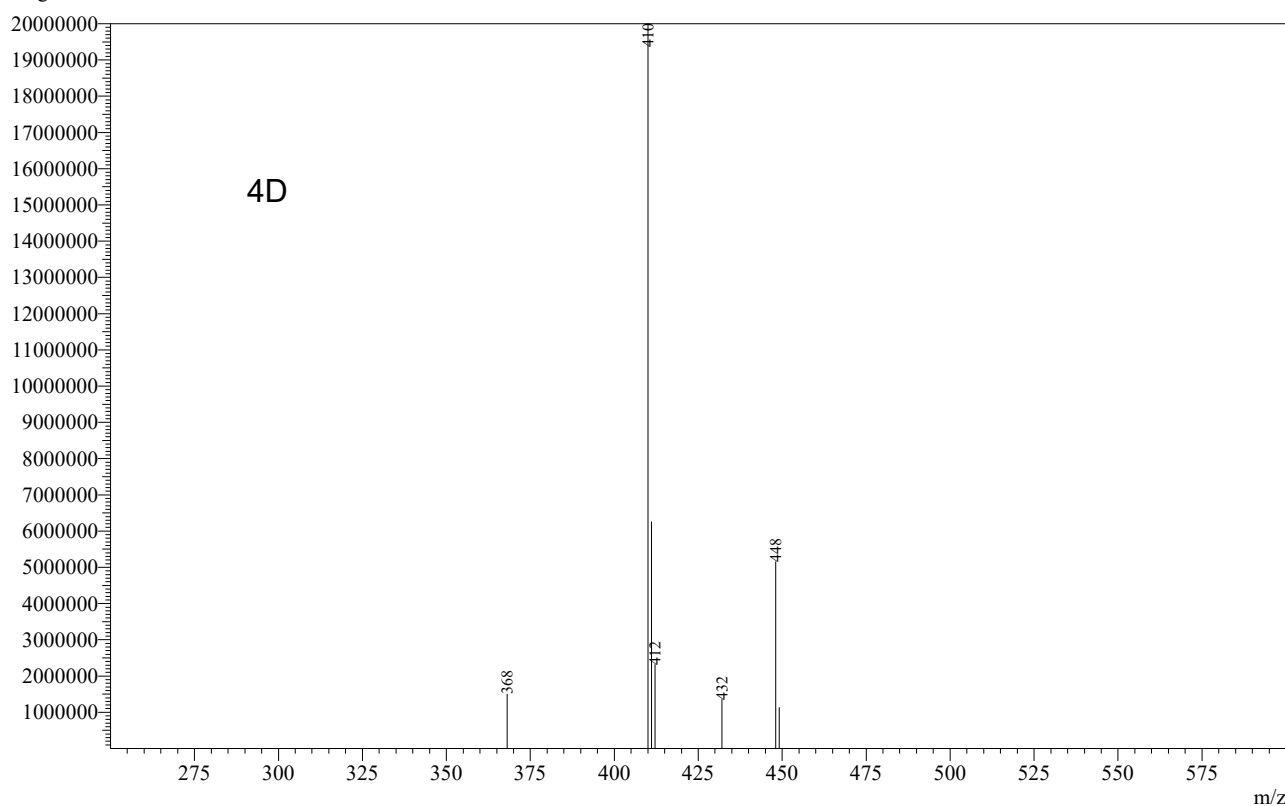

MS Spectrum

R.Time:0.433(Scan#:)

MassPeaks:28

Segment 1 - Event 1

| #  | m/z    | Relative Intensity | Relative Intensity |
|----|--------|--------------------|--------------------|
| 1  | 102.15 | 4385429            | 21.93              |
| 2  | 105.10 | 9714987            | 48.57              |
| 3  | 110.10 | 4366808            | 21.83              |
| 4  | 114.75 | 2231804            | 11.16              |
| 5  | 122.65 | 10073433           | 50.37              |
| 6  | 130.55 | 4621868            | 23.11              |
| 7  | 139.05 | 1369684            | 6.85               |
| 8  | 143.15 | 4442296            | 22.21              |
| 9  | 151.15 | 1695863            | 8.48               |
| 10 | 167.10 | 3695790            | 18.48              |
| 11 | 180.10 | 1467246            | 7.34               |
| 12 | 183.05 | 2992030            | 14.96              |
| 13 | 196.15 | 1832283            | 9.16               |
| 14 | 199.10 | 1058553            | 5.29               |
| 15 | 208.10 | 4964368            | 24.82              |
| 16 | 214.10 | 12945981           | 64.73              |
| 17 | 215.15 | 1660052            | 8.30               |
| 18 | 216.10 | 1066837            | 5.33               |
| 19 | 224.05 | 3194272            | 15.97              |

| #  | m/z    | bsolute Inten | ative Inten |
|----|--------|---------------|-------------|
| 20 | 435.25 | 20000000      | 100.00      |
| 21 | 436.30 | 6408858       | 32.04       |
| 22 | 437.30 | 2080486       | 10.40       |
| 23 | 571.20 | 1200278       | 6.00        |
| 24 | 931.45 | 9702024       | 48.51       |
| 25 | 932.45 | 5358266       | 26.79       |
| 26 | 933.45 | 6513540       | 32.57       |
| 27 | 934.40 | 2830446       | 14.15       |
| 28 | 935.35 | 1057383       | 5.29        |



4E

SHIMADZU  
LabSolutions

## Analysis Report

## &lt;Sample Information&gt;

Sample Name : 220516 NJ 1933  
 Sample ID : 220516 NJ 1933  
 Data Filename : 220516 NJ 1933.lcd  
 Method Filename : NNDKG.lcm  
 Batch Filename :  
 Vial # : 1-1  
 Injection Volume : 1 uL  
 Date Acquired : 16/05/2022 12:18:54  
 Date Processed : 16/05/2022 12:19:50

Sample Type : Unknown

Acquired by : System Administrator  
 Processed by : System Administrator

MS Spectrum

R.Time:0.433(Scan#:)

MassPeaks:10

Segment 1 - Event 1

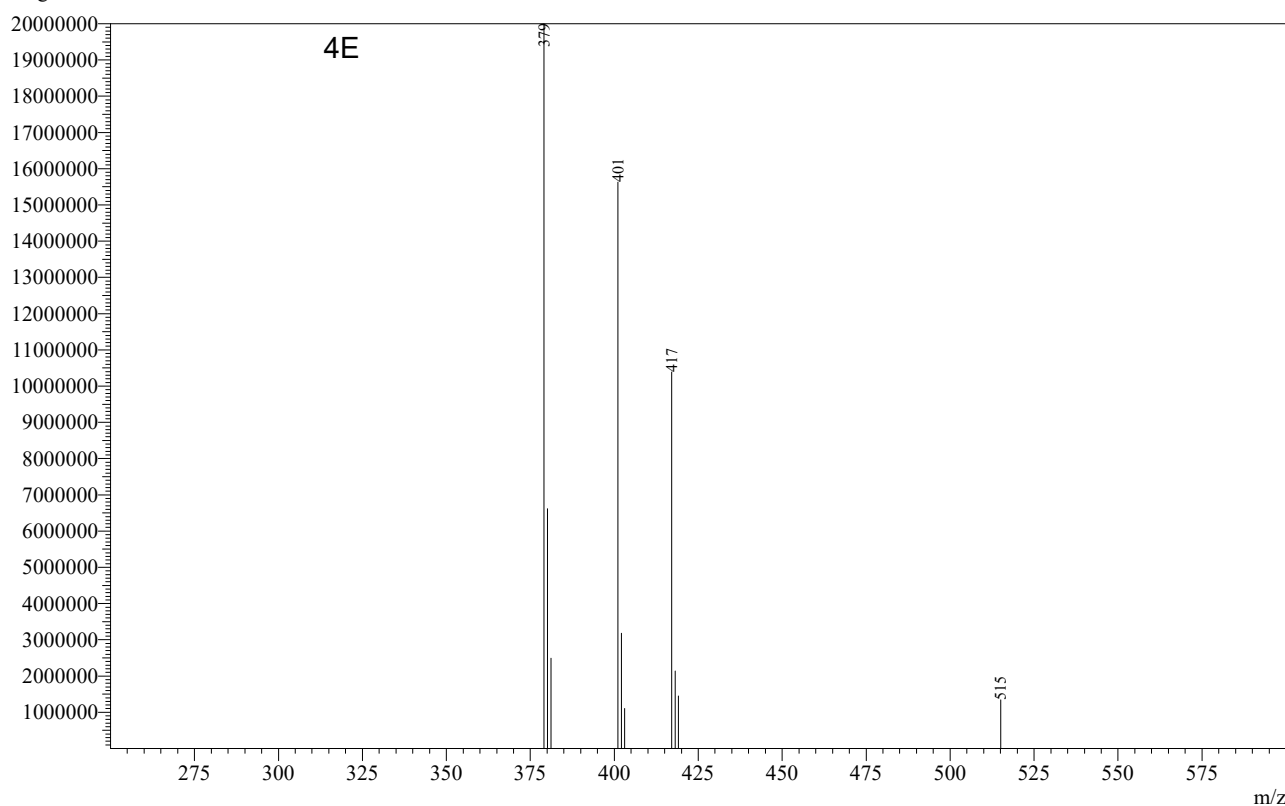

MS Spectrum

R.Time:0.433(Scan#:)

MassPeaks:28

Segment 1 - Event 1

| #  | m/z    | solute Inten | relative Inten |
|----|--------|--------------|----------------|
| 1  | 102.15 | 4385429      | 21.93          |
| 2  | 105.10 | 9714987      | 48.57          |
| 3  | 110.10 | 4366808      | 21.83          |
| 4  | 114.75 | 2231804      | 11.16          |
| 5  | 122.65 | 10073433     | 50.37          |
| 6  | 130.55 | 4621868      | 23.11          |
| 7  | 139.05 | 1369684      | 6.85           |
| 8  | 143.15 | 4442296      | 22.21          |
| 9  | 151.15 | 1695863      | 8.48           |
| 10 | 167.10 | 3695790      | 18.48          |
| 11 | 180.10 | 1467246      | 7.34           |
| 12 | 183.05 | 2992030      | 14.96          |
| 13 | 196.15 | 1832283      | 9.16           |
| 14 | 199.10 | 1058553      | 5.29           |
| 15 | 208.10 | 4964368      | 24.82          |
| 16 | 214.10 | 12945981     | 64.73          |
| 17 | 215.15 | 1660052      | 8.30           |
| 18 | 216.10 | 1066837      | 5.33           |
| 19 | 224.05 | 3194272      | 15.97          |

| #  | m/z    | absolute Inten | relative Inten |
|----|--------|----------------|----------------|
| 20 | 435.25 | 20000000       | 100.00         |
| 21 | 436.30 | 6408858        | 32.04          |
| 22 | 437.30 | 2080486        | 10.40          |
| 23 | 571.20 | 1200278        | 6.00           |
| 24 | 931.45 | 9702024        | 48.51          |
| 25 | 932.45 | 5358266        | 26.79          |
| 26 | 933.45 | 6513540        | 32.57          |
| 27 | 934.40 | 2830446        | 14.15          |
| 28 | 935.35 | 1057383        | 5.29           |

4F

SHIMADZU  
LabSolutions

## Analysis Report

## &lt;Sample Information&gt;

Sample Name : 220516 NJ 1897  
 Sample ID : 220516 NJ 1897  
 Data Filename : 220516 NJ 1897.lcd  
 Method Filename : NNDKG.lcm  
 Batch Filename :  
 Vial # : 1-1  
 Injection Volume : 1 uL  
 Date Acquired : 16/05/2022 12:41:43  
 Date Processed : 16/05/2022 12:42:38

Sample Type : Unknown

Acquired by : System Administrator  
 Processed by : System Administrator

MS Spectrum

R.Time:0.433(Scan#:)

MassPeaks:13

Segment 1 - Event 1

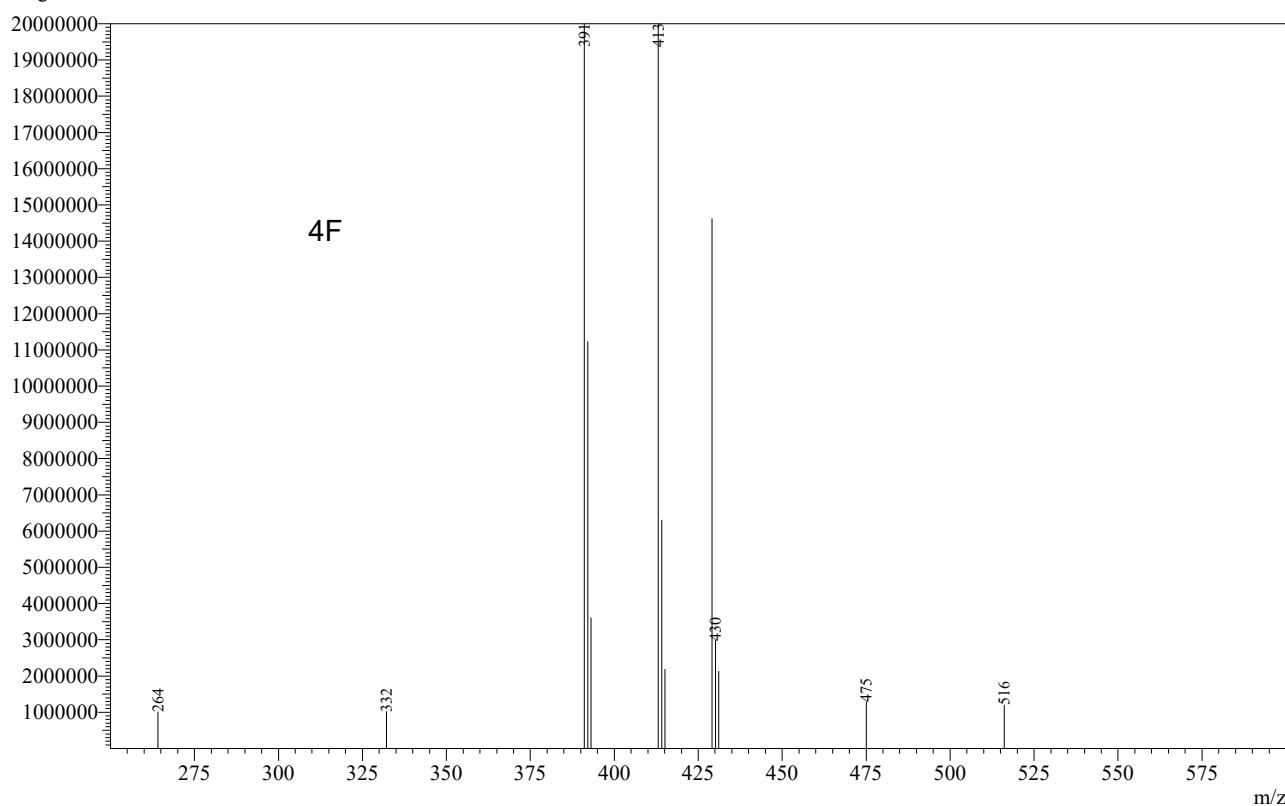

MS Spectrum

R.Time:0.433(Scan#:)

MassPeaks:28

Segment 1 - Event 1

| #  | m/z    | Relative Intensity | Relative Intensity |
|----|--------|--------------------|--------------------|
| 1  | 102.15 | 4385429            | 21.93              |
| 2  | 105.10 | 9714987            | 48.57              |
| 3  | 110.10 | 4366808            | 21.83              |
| 4  | 114.75 | 2231804            | 11.16              |
| 5  | 122.65 | 10073433           | 50.37              |
| 6  | 130.55 | 4621868            | 23.11              |
| 7  | 139.05 | 1369684            | 6.85               |
| 8  | 143.15 | 4442296            | 22.21              |
| 9  | 151.15 | 1695863            | 8.48               |
| 10 | 167.10 | 3695790            | 18.48              |
| 11 | 180.10 | 1467246            | 7.34               |
| 12 | 183.05 | 2992030            | 14.96              |
| 13 | 196.15 | 1832283            | 9.16               |
| 14 | 199.10 | 1058553            | 5.29               |
| 15 | 208.10 | 4964368            | 24.82              |
| 16 | 214.10 | 12945981           | 64.73              |
| 17 | 215.15 | 1660052            | 8.30               |
| 18 | 216.10 | 1066837            | 5.33               |
| 19 | 224.05 | 3194272            | 15.97              |

| #  | m/z    | bsolute Inten | ative Inten |
|----|--------|---------------|-------------|
| 20 | 435.25 | 20000000      | 100.00      |
| 21 | 436.30 | 6408858       | 32.04       |
| 22 | 437.30 | 2080486       | 10.40       |
| 23 | 571.20 | 1200278       | 6.00        |
| 24 | 931.45 | 9702024       | 48.51       |
| 25 | 932.45 | 5358266       | 26.79       |
| 26 | 933.45 | 6513540       | 32.57       |
| 27 | 934.40 | 2830446       | 14.15       |
| 28 | 935.35 | 1057383       | 5.29        |

4G



SHIMADZU

LabSolutions

# Analysis Report

## <Sample Information>

Sample Name : 220516 NJ 1898  
 Sample ID : 220516 NJ 1898  
 Data Filename : 220516 NJ 1898.lcd  
 Method Filename : NNDKG.lcm  
 Batch Filename :  
 Vial # : 1-1  
 Injection Volume : 1 uL  
 Date Acquired : 16/05/2022 13:07:35  
 Date Processed : 16/05/2022 13:08:31

Sample Type : Unknown

Acquired by : System Administrator  
 Processed by : System Administrator

MS Spectrum

R.Time:0.433(Scan#:)

MassPeaks:21

Segment 1 - Event 1

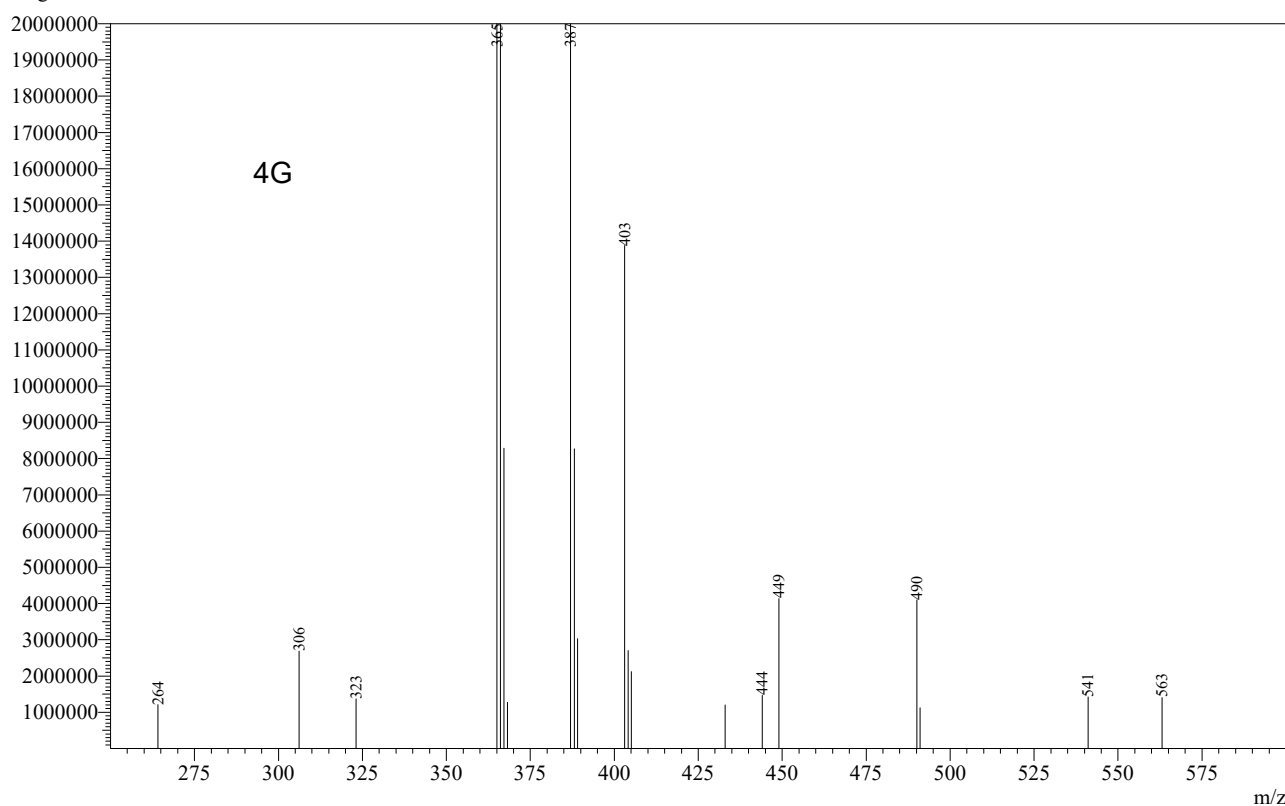

MS Spectrum

R.Time:0.433(Scan#:)

MassPeaks:28

Segment 1 - Event 1

| #  | m/z    | solute Inten | relative Inten |
|----|--------|--------------|----------------|
| 1  | 102.15 | 4385429      | 21.93          |
| 2  | 105.10 | 9714987      | 48.57          |
| 3  | 110.10 | 4366808      | 21.83          |
| 4  | 114.75 | 2231804      | 11.16          |
| 5  | 122.65 | 10073433     | 50.37          |
| 6  | 130.55 | 4621868      | 23.11          |
| 7  | 139.05 | 1369684      | 6.85           |
| 8  | 143.15 | 4442296      | 22.21          |
| 9  | 151.15 | 1695863      | 8.48           |
| 10 | 167.10 | 3695790      | 18.48          |
| 11 | 180.10 | 1467246      | 7.34           |
| 12 | 183.05 | 2992030      | 14.96          |
| 13 | 196.15 | 1832283      | 9.16           |
| 14 | 199.10 | 1058553      | 5.29           |
| 15 | 208.10 | 4964368      | 24.82          |
| 16 | 214.10 | 12945981     | 64.73          |
| 17 | 215.15 | 1660052      | 8.30           |
| 18 | 216.10 | 1066837      | 5.33           |
| 19 | 224.05 | 3194272      | 15.97          |

| #  | m/z    | absolute Inten | relative Inten |
|----|--------|----------------|----------------|
| 20 | 435.25 | 20000000       | 100.00         |
| 21 | 436.30 | 6408858        | 32.04          |
| 22 | 437.30 | 2080486        | 10.40          |
| 23 | 571.20 | 1200278        | 6.00           |
| 24 | 931.45 | 9702024        | 48.51          |
| 25 | 932.45 | 5358266        | 26.79          |
| 26 | 933.45 | 6513540        | 32.57          |
| 27 | 934.40 | 2830446        | 14.15          |
| 28 | 935.35 | 1057383        | 5.29           |

4H

SHIMADZU  
LabSolutions

## Analysis Report

## &lt;Sample Information&gt;

Sample Name : 220516 NJ 1912  
 Sample ID : 220516 NJ 1912  
 Data Filename : 220516 NJ 1912.lcd  
 Method Filename : NNDKG.lcm  
 Batch Filename :  
 Vial # : 1-1  
 Injection Volume : 1 uL  
 Date Acquired : 16/05/2022 12:31:19  
 Date Processed : 16/05/2022 12:32:15

Sample Type : Unknown

Acquired by : System Administrator  
 Processed by : System Administrator

MS Spectrum

R.Time:0.433(Scan#:)

MassPeaks:12

Segment 1 - Event 1

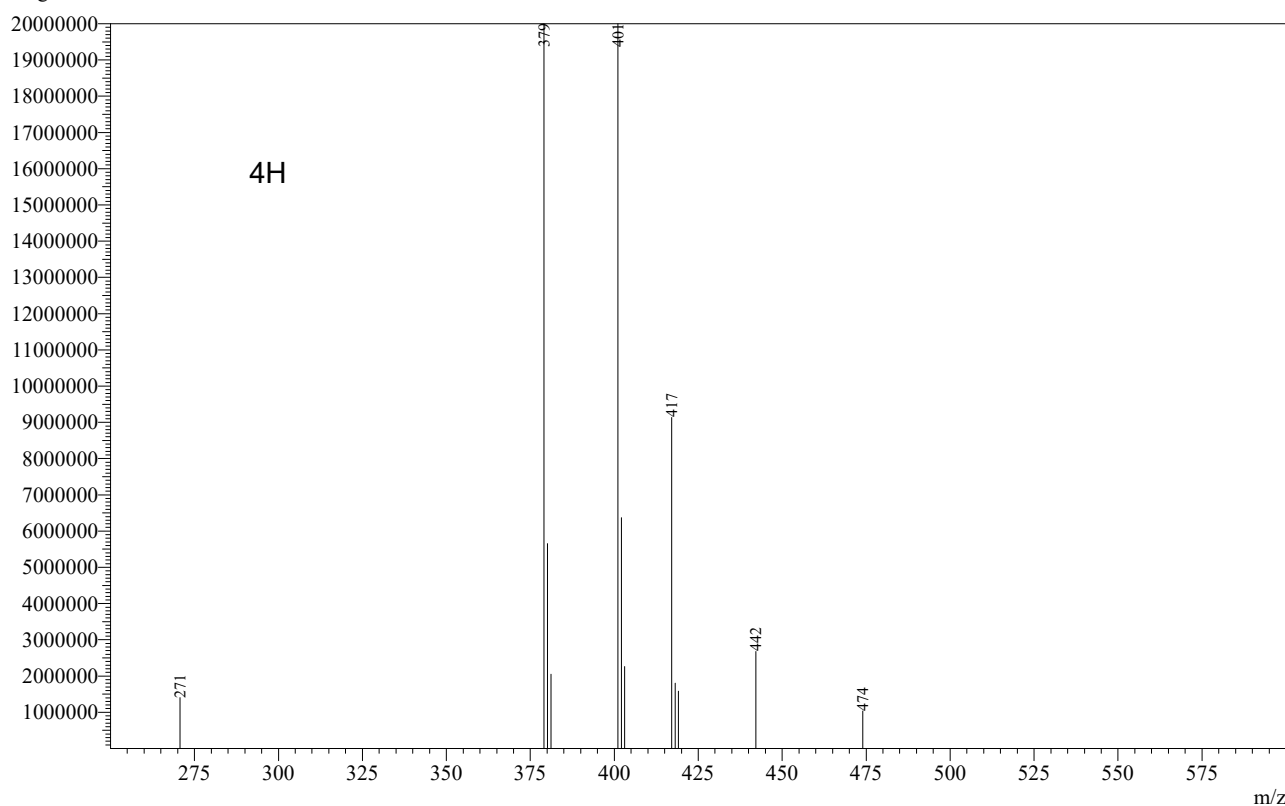

MS Spectrum

R.Time:0.433(Scan#:)

MassPeaks:28

Segment 1 - Event 1

| #  | m/z    | solute Inten | relative Inten |
|----|--------|--------------|----------------|
| 1  | 102.15 | 4385429      | 21.93          |
| 2  | 105.10 | 9714987      | 48.57          |
| 3  | 110.10 | 4366808      | 21.83          |
| 4  | 114.75 | 2231804      | 11.16          |
| 5  | 122.65 | 10073433     | 50.37          |
| 6  | 130.55 | 4621868      | 23.11          |
| 7  | 139.05 | 1369684      | 6.85           |
| 8  | 143.15 | 4442296      | 22.21          |
| 9  | 151.15 | 1695863      | 8.48           |
| 10 | 167.10 | 3695790      | 18.48          |
| 11 | 180.10 | 1467246      | 7.34           |
| 12 | 183.05 | 2992030      | 14.96          |
| 13 | 196.15 | 1832283      | 9.16           |
| 14 | 199.10 | 1058553      | 5.29           |
| 15 | 208.10 | 4964368      | 24.82          |
| 16 | 214.10 | 12945981     | 64.73          |
| 17 | 215.15 | 1660052      | 8.30           |
| 18 | 216.10 | 1066837      | 5.33           |
| 19 | 224.05 | 3194272      | 15.97          |

| #  | m/z    | bsolute Inten | ative Inten |
|----|--------|---------------|-------------|
| 20 | 435.25 | 20000000      | 100.00      |
| 21 | 436.30 | 6408858       | 32.04       |
| 22 | 437.30 | 2080486       | 10.40       |
| 23 | 571.20 | 1200278       | 6.00        |
| 24 | 931.45 | 9702024       | 48.51       |
| 25 | 932.45 | 5358266       | 26.79       |
| 26 | 933.45 | 6513540       | 32.57       |
| 27 | 934.40 | 2830446       | 14.15       |
| 28 | 935.35 | 1057383       | 5.29        |



41

SHIMADZU  
LabSolutions

## Analysis Report

## &lt;Sample Information&gt;

Sample Name : 220516 NJ 1916  
 Sample ID : 220516 NJ 1916  
 Data Filename : 220516 NJ 1916.lcd  
 Method Filename : NNDKG.lcm  
 Batch Filename :  
 Vial # : 1-1  
 Injection Volume : 1 uL  
 Date Acquired : 16/05/2022 12:49:48  
 Date Processed : 16/05/2022 12:50:43

Sample Type : Unknown

Acquired by : System Administrator  
 Processed by : System Administrator

MS Spectrum

R.Time:0.433(Scan#:)

MassPeaks:22

Segment 1 - Event 1

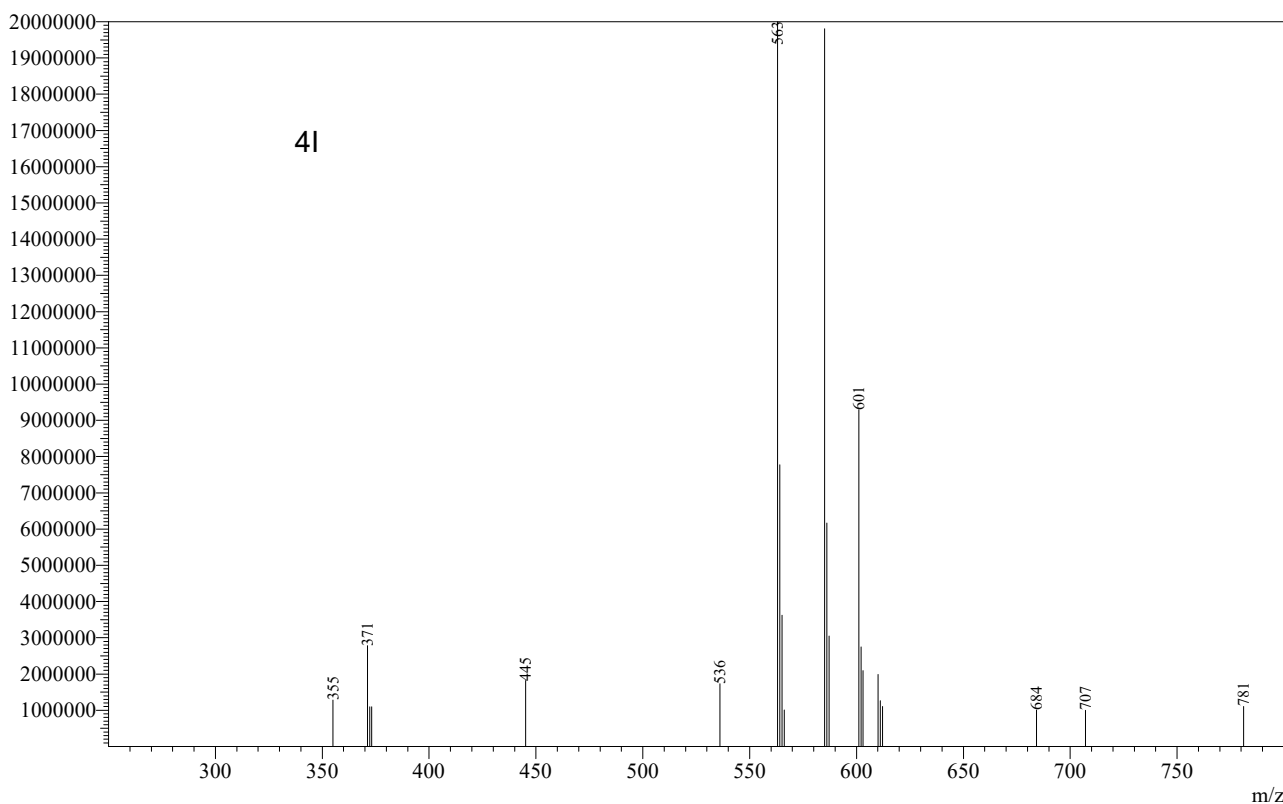

MS Spectrum

R.Time:0.433(Scan#:)

MassPeaks:28

Segment 1 - Event 1

| #  | m/z    | solute Inten | relative Inten |
|----|--------|--------------|----------------|
| 1  | 102.15 | 4385429      | 21.93          |
| 2  | 105.10 | 9714987      | 48.57          |
| 3  | 110.10 | 4366808      | 21.83          |
| 4  | 114.75 | 2231804      | 11.16          |
| 5  | 122.65 | 10073433     | 50.37          |
| 6  | 130.55 | 4621868      | 23.11          |
| 7  | 139.05 | 1369684      | 6.85           |
| 8  | 143.15 | 4442296      | 22.21          |
| 9  | 151.15 | 1695863      | 8.48           |
| 10 | 167.10 | 3695790      | 18.48          |
| 11 | 180.10 | 1467246      | 7.34           |
| 12 | 183.05 | 2992030      | 14.96          |
| 13 | 196.15 | 1832283      | 9.16           |
| 14 | 199.10 | 1058553      | 5.29           |
| 15 | 208.10 | 4964368      | 24.82          |
| 16 | 214.10 | 12945981     | 64.73          |
| 17 | 215.15 | 1660052      | 8.30           |
| 18 | 216.10 | 1066837      | 5.33           |
| 19 | 224.05 | 3194272      | 15.97          |

| #  | m/z    | absolute Inten | relative Inten |
|----|--------|----------------|----------------|
| 20 | 435.25 | 20000000       | 100.00         |
| 21 | 436.30 | 6408858        | 32.04          |
| 22 | 437.30 | 2080486        | 10.40          |
| 23 | 571.20 | 1200278        | 6.00           |
| 24 | 931.45 | 9702024        | 48.51          |
| 25 | 932.45 | 5358266        | 26.79          |
| 26 | 933.45 | 6513540        | 32.57          |
| 27 | 934.40 | 2830446        | 14.15          |
| 28 | 935.35 | 1057383        | 5.29           |

4J



SHIMADZU

LabSolutions

# Analysis Report

## <Sample Information>

Sample Name : 220516 NJ 1922  
 Sample ID : 220516 NJ 1922  
 Data Filename : 220516 NJ 1924.lcd  
 Method Filename : NNDKG.lcm  
 Batch Filename :  
 Vial # : 1-1  
 Injection Volume : 1 uL  
 Date Acquired : 16/05/2022 12:24:19  
 Date Processed : 16/05/2022 12:25:15

Sample Type : Unknown

Acquired by : System Administrator  
 Processed by : System Administrator

MS Spectrum

R.Time:0.433(Scan#:)

MassPeaks:9

Segment 1 - Event 1

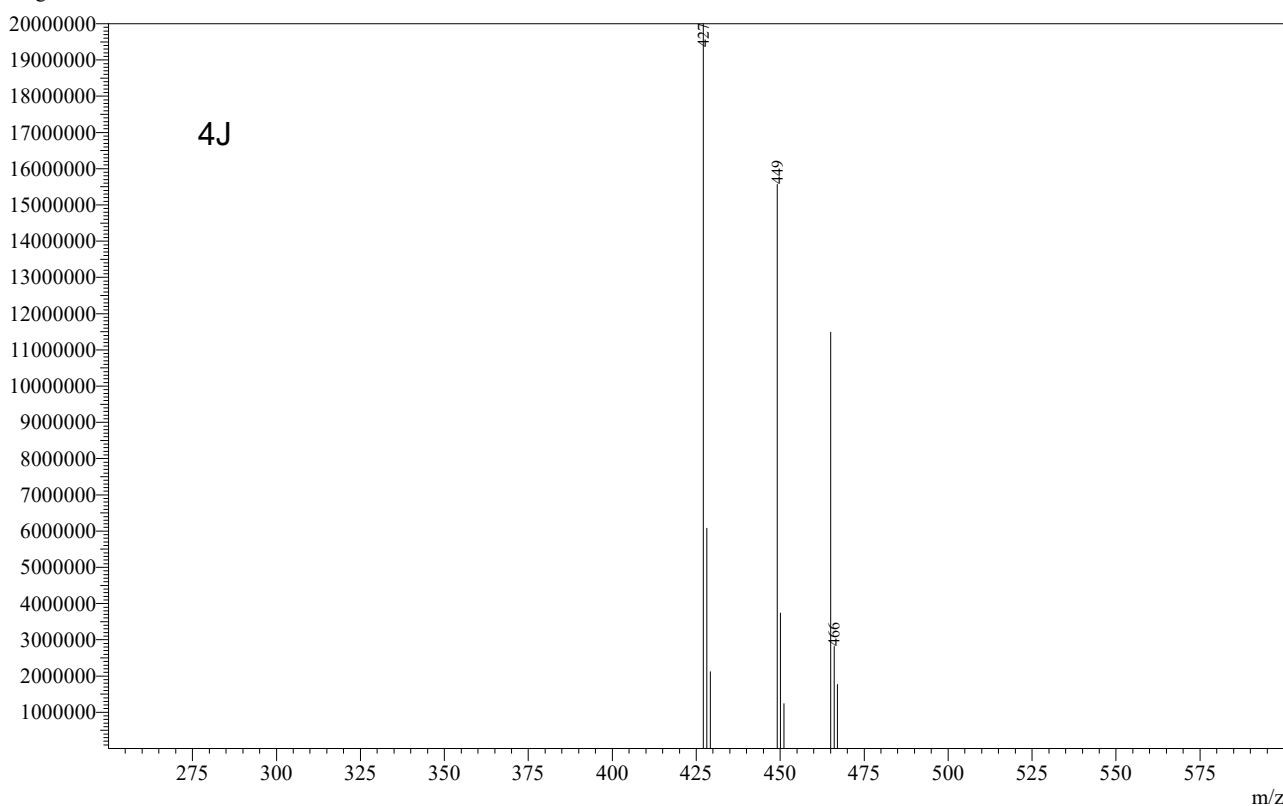

MS Spectrum

R.Time:0.433(Scan#:)

MassPeaks:28

Segment 1 - Event 1

| #  | m/z    | solute Inten | relative Inten |
|----|--------|--------------|----------------|
| 1  | 102.15 | 4385429      | 21.93          |
| 2  | 105.10 | 9714987      | 48.57          |
| 3  | 110.10 | 4366808      | 21.83          |
| 4  | 114.75 | 2231804      | 11.16          |
| 5  | 122.65 | 10073433     | 50.37          |
| 6  | 130.55 | 4621868      | 23.11          |
| 7  | 139.05 | 1369684      | 6.85           |
| 8  | 143.15 | 4442296      | 22.21          |
| 9  | 151.15 | 1695863      | 8.48           |
| 10 | 167.10 | 3695790      | 18.48          |
| 11 | 180.10 | 1467246      | 7.34           |
| 12 | 183.05 | 2992030      | 14.96          |
| 13 | 196.15 | 1832283      | 9.16           |
| 14 | 199.10 | 1058553      | 5.29           |
| 15 | 208.10 | 4964368      | 24.82          |
| 16 | 214.10 | 12945981     | 64.73          |
| 17 | 215.15 | 1660052      | 8.30           |
| 18 | 216.10 | 1066837      | 5.33           |
| 19 | 224.05 | 3194272      | 15.97          |

| #  | m/z    | bsolute Inten | ative Inten |
|----|--------|---------------|-------------|
| 20 | 435.25 | 20000000      | 100.00      |
| 21 | 436.30 | 6408858       | 32.04       |
| 22 | 437.30 | 2080486       | 10.40       |
| 23 | 571.20 | 1200278       | 6.00        |
| 24 | 931.45 | 9702024       | 48.51       |
| 25 | 932.45 | 5358266       | 26.79       |
| 26 | 933.45 | 6513540       | 32.57       |
| 27 | 934.40 | 2830446       | 14.15       |
| 28 | 935.35 | 1057383       | 5.29        |

4K



SHIMADZU

LabSolutions

# Analysis Report

## <Sample Information>

Sample Name : 220516 NJ 1941  
 Sample ID : 220516 NJ 1941  
 Data Filename : 220516 NJ 1941.lcd  
 Method Filename : NNDKG.lcm  
 Batch Filename :  
 Vial # : 1-1  
 Injection Volume : 1 uL  
 Date Acquired : 16/05/2022 12:39:37  
 Date Processed : 16/05/2022 12:40:32

Sample Type : Unknown

Acquired by : System Administrator  
 Processed by : System Administrator

MS Spectrum

R.Time:0.433(Scan#:)

MassPeaks:12

Segment 1 - Event 1

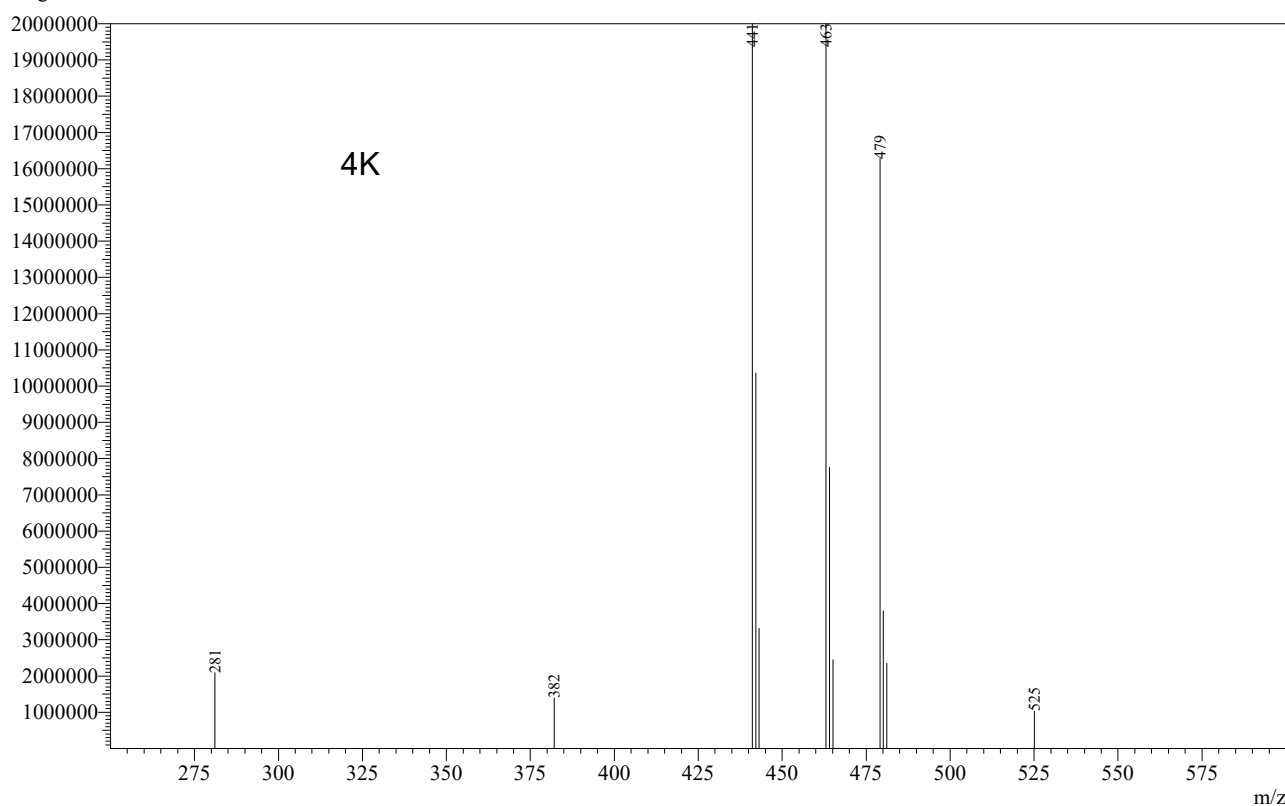

MS Spectrum

R.Time:0.433(Scan#:)

MassPeaks:28

Segment 1 - Event 1

| #  | m/z    | absolute Intensity | relative Intensity |
|----|--------|--------------------|--------------------|
| 1  | 102.15 | 4385429            | 21.93              |
| 2  | 105.10 | 9714987            | 48.57              |
| 3  | 110.10 | 4366808            | 21.83              |
| 4  | 114.75 | 2231804            | 11.16              |
| 5  | 122.65 | 10073433           | 50.37              |
| 6  | 130.55 | 4621868            | 23.11              |
| 7  | 139.05 | 1369684            | 6.85               |
| 8  | 143.15 | 4442296            | 22.21              |
| 9  | 151.15 | 1695863            | 8.48               |
| 10 | 167.10 | 3695790            | 18.48              |
| 11 | 180.10 | 1467246            | 7.34               |
| 12 | 183.05 | 2992030            | 14.96              |
| 13 | 196.15 | 1832283            | 9.16               |
| 14 | 199.10 | 1058553            | 5.29               |
| 15 | 208.10 | 4964368            | 24.82              |
| 16 | 214.10 | 12945981           | 64.73              |
| 17 | 215.15 | 1660052            | 8.30               |
| 18 | 216.10 | 1066837            | 5.33               |
| 19 | 224.05 | 3194272            | 15.97              |

| #  | m/z    | bsolute Inten | ative Inten |
|----|--------|---------------|-------------|
| 20 | 435.25 | 20000000      | 100.00      |
| 21 | 436.30 | 6408858       | 32.04       |
| 22 | 437.30 | 2080486       | 10.40       |
| 23 | 571.20 | 1200278       | 6.00        |
| 24 | 931.45 | 9702024       | 48.51       |
| 25 | 932.45 | 5358266       | 26.79       |
| 26 | 933.45 | 6513540       | 32.57       |
| 27 | 934.40 | 2830446       | 14.15       |
| 28 | 935.35 | 1057383       | 5.29        |
